# Supplementary material
Source: PubMed Central journal article supplement (PMC6421865)
Supplement: NIHMS949397-supplement.pdf [file NIHMS949397-supplement.pdf]

## Supplemental Tables and Figures

Table S1. Genetic composition of VRC-PG05

Table S2. Neutralization IC<sub>50</sub> values of VRC-PG05 against 208 HIV-1 Env pseudoviruses

Table S3. Statistics on VRC-PG05 neutralization profile based on the extended 220-isolate panel

Table S4. Crystallographic data collection and refinement statistics

Table S5. Contributions of glycan and protein to the VRC-PG05 epitope

Table S6. Contributions of VRC-PG05 heavy and light chain paratope residues to the binding of HIV-1 glycans and amino acids

Table S7. Hydrogen bonds between HIV-1 gp120 glycans and VRC-PG05

Figure S1. Binding and neutralization properties of VRC-PG05 and its relevance in donor plasma

Figure S2. Negative-stain electron microscopy of VRC-PG05 bound to HIV-1 ZM109 gp120 core

Figure S3. VRC-PG05 interaction with glycans

Figure S4. Comparison of modes of recognition of VRC-PG05 and other glycan-reactive antibodies

Figure S5. Negative-stain electron microscopy of AC10.29.SOSIP Env in complex with VRC-PG05

Figure S6. VRC-PG05 clonal variants identified by next generation sequencing

Figure S7. VRC-PG05 binding to BG505.SOSIP mutant, neutralization sensitivity of select autologous Env clones from IAVI donor 74 and sequence frequency analysis of epitope residues

**Table S1. Comparison of genetic composition of VRC-PG05 with that of VRC-PG04 isolated from the same IAVI Donor #74. Related to Figure 1.**

| Antibody  | Donor   | IGHV   | IGHV mutation frequency | CDRH3 length (amino acid) | IGKV    | IGKV mutation frequency | CDRL3 length (amino acids) |
|-----------|---------|--------|-------------------------|---------------------------|---------|-------------------------|----------------------------|
| VRC-PG05  | IAVI 74 | 3-7*01 | 27/288 (9%)             | 17                        | 4-1*01  | 17/282 (6%)             | 8                          |
| VRC-PG04  | IAVI 74 | 1-2*02 | 86/288 (30%)            | 14                        | 3-20*01 | 51/267 (19%)            | 5                          |
| VRC-PG04b | IAVI 74 | 1-2*02 | 85/288 (30%)            | 14                        | 3-20*01 | 50/267 (19%)            | 5                          |

**Table S2. Neutralization IC<sub>50</sub> values of VRC-PG05 against 208 HIV-1 Env pseudoviruses. Related to Figure 1.**

| Virus           | Clade | IC50 (µg/ml) | Virus     | Clade | IC50 (µg/ml) | Virus           | Clade | IC50 (µg/ml) | Virus          | Clade | IC50 (µg/ml) |
|-----------------|-------|--------------|-----------|-------|--------------|-----------------|-------|--------------|----------------|-------|--------------|
| 0260.v5.c36     | A     | >50          | R2184.c4  | AE    | 43.000       | SS1196.01       | B     | >50          | DU123.06       | C     | >50          |
| 0330.v4.c3      | A     | >50          | R3265.c6  | AE    | >50          | THRO.18         | B     | >50          | DU151.02       | C     | 0.577        |
| 0439.v5.c1      | A     | >50          | TH023.6   | AE    | 0.1750       | TRJO.58         | B     | >50          | DU156.12       | C     | >50          |
| 3365.v2.c20     | A     | 3.710        | TH966.8   | AE    | 34.300       | TRO.11          | B     | >50          | DU172.17       | C     | >50          |
| 3415.v1.c1      | A     | >50          | TH976.17  | AE    | >50          | WITO.33         | B     | >50          | DU422.01       | C     | 5.990        |
| 3718.v3.c11     | A     | >50          | 235-47    | AG    | >50          | X2278.C2.B6     | B     | >50          | MW965.26       | C     | >50          |
| 398-F1_F6_20    | A     | >50          | 242-14    | AG    | >50          | YU2.DG          | B     | >50          | SO18.18        | C     | >50          |
| BB201.B42       | A     | >50          | 263-8     | AG    | >50          | BJOX002000.03.2 | BC    | >50          | TV1.29         | C     | >50          |
| BB539.2B13      | A     | >50          | 269-12    | AG    | >50          | CH038.12        | BC    | 17.80        | TZA125.17      | C     | >50          |
| BG505.W6M.C2    | A     | >50          | 271-11    | AG    | >50          | CH070.1         | BC    | 0.341        | TZBD.02        | C     | 17.100       |
| BI369.9A        | A     | >50          | 928-28    | AG    | 0.875        | CH117.4         | BC    | >50          | ZA012.29       | C     | >50          |
| BS208.B1        | A     | >50          | DJ263.8   | AG    | >50          | CH119.10        | BC    | >50          | ZM106.9        | C     | >50          |
| KER2008.12      | A     | >50          | T250-4    | AG    | >50          | CH181.12        | BC    | >50          | ZM109.4        | C     | 0.520        |
| KER2018.11      | A     | >50          | T251-18   | AG    | >50          | CNE15           | BC    | >50          | ZM135.10a      | C     | >50          |
| KNH1209.18      | A     | >50          | T253-11   | AG    | >50          | CNE19           | BC    | >50          | ZM176.66       | C     | >50          |
| MB201.A1        | A     | >50          | T255-34   | AG    | 0.566        | CNE20           | BC    | >50          | ZM197.7        | C     | >50          |
| MB539.2B7       | A     | >50          | T257-31   | AG    | >50          | CNE21           | BC    | >50          | ZM214.15       | C     | >50          |
| MI369.A5        | A     | >50          | T266-60   | AG    | >50          | CNE40           | BC    | >50          | ZM215.8        | C     | >50          |
| MS208.A1        | A     | >50          | T278-50   | AG    | >50          | CNE7            | BC    | 0.054        | ZM233.6        | C     | >50          |
| Q23.17          | A     | >50          | T280-5    | AG    | >50          | 286.36          | C     | >50          | ZM249.1        | C     | >50          |
| Q259.17         | A     | >50          | T33-7     | AG    | >50          | 288.38          | C     | >50          | ZM53.12        | C     | 0.171        |
| Q769.d22        | A     | 0.724        | 3988.25   | B     | 12.6000      | 0013095-2.11    | C     | >50          | ZM55.28a       | C     | >50          |
| Q769.h5         | A     | 0.016        | 5768.04   | B     | >50          | 001428-2.42     | C     | 0.324        | 3326.V4.C3     | CD    | >50          |
| Q842.d12        | A     | >50          | 6101.10   | B     | 43.5000      | 0077_V1.C16     | C     | 0.051        | 3337.V2.C6     | CD    | 2.780        |
| QH209.14M.A2    | A     | 0.298        | 6535.3    | B     | >50          | 00836-2.5       | C     | >50          | 3817.v2.c59    | CD    | >50          |
| RW020.2         | A     | >50          | 7165.18   | B     | >50          | 0921.V2.C14     | C     | 0.111        | 191821.E6.1    | D     | >50          |
| UG037.8         | A     | >50          | 45_01dG5  | B     | >50          | 16055-2.3       | C     | >50          | 231965.c1      | D     | >50          |
| 246-F3.C10.2    | AC    | 0.059        | 89.6      | B     | >50          | 16845-2.22      | C     | >50          | 247-23         | D     | 19.000       |
| 3301.V1.C24     | AC    | >50          | AC10.29   | B     | 0.019        | 16936-2.21      | C     | >50          | 3016.v5.c45    | D     | 7.120        |
| 3589.V1.C4      | AC    | >50          | ADA       | B     | 29.400       | 25710-2.43      | C     | >50          | 57128.vrc15    | D     | >50          |
| 6540.v4.c1      | AC    | >50          | Bal.01    | B     | 0.642        | 25711-2.4       | C     | 7.620        | 6405.v4.c34    | D     | >50          |
| 6545.V4.C1      | AC    | >50          | BaL.26    | B     | 0.897        | 25925-2.22      | C     | >50          | A03349M1.vrc4a | D     | >50          |
| 0815.V3.C3      | ACD   | >50          | BG1168.01 | B     | >50          | 26191-2.48      | C     | >50          | A07412M1.vrc12 | D     | >50          |
| 6095.V1.C10     | ACD   | 0.013        | BL01      | B     | >50          | 3168.V4.C10     | C     | 0.031        | NKU3006.ec1    | D     | >50          |
| 3468.V1.C12     | AD    | >50          | BR07      | B     | >50          | 3637.V5.C3      | C     | >50          | UG021.16       | D     | >50          |
| Q168.a2         | AD    | >50          | BX08.16   | B     | >50          | 3873.V1.C24     | C     | >50          | UG024.2        | D     | >50          |
| Q461.e2         | AD    | >50          | CAAN.A2   | B     | 0.003        | 426c            | C     | >50          | P0402.c2.11    | G     | >50          |
| 620345.c1       | AE    | 0.336        | CNE10     | B     | >50          | 6322.V4.C1      | C     | 2.260        | P1981.C5.3     | G     | >50          |
| BJOX009000.02.4 | AE    | >50          | CNE12     | B     | 1.600        | 6471.V1.C16     | C     | >50          | X1193.c1       | G     | >50          |
| BJOX010000.06.2 | AE    | >50          | CNE14     | B     | 0.003        | 6631.V3.C10     | C     | >50          | X1254.c3       | G     | >50          |
| BJOX025000.01.1 | AE    | 1.950        | CNE4      | B     | >50          | 6644.V2.C33     | C     | >50          | X1632.S2.B10   | G     | >50          |
| BJOX028000.10.3 | AE    | >50          | CNE57     | B     | 10.700       | 6785.V5.C14     | C     | >50          | X2088.c9       | G     | >50          |
| C1080.c3        | AE    | 45.900       | HO86.8    | B     | 1.430        | 6838.V1.C35     | C     | 1.000        | X2131.C1.B5    | G     | >50          |
| C2101.c1        | AE    | 2.300        | HT593.1   | B     | 0.453        | 96ZM651.02      | C     | >50          | 356272.c02 *   | AE    | 1.420        |
| C3347.c11       | AE    | 3.420        | HXB2      | B     | >50          | BR025.9         | C     | >50          | 427299.c12     | AE    | >50          |
| C4118.09        | AE    | 2.540        | JR-CSF    | B     | >50          | CAP210.E8       | C     | >50          | 703357.c02     | AE    | >50          |
| CM244.ec1       | AE    | >50          | JR-FL     | B     | 2.650        | CAP244.D3       | C     | >50          | 816763.c02     | AE    | 12.200       |
| CNE3            | AE    | 0.053        | MN.3      | B     | >50          | CAP256.206.C9   | C     | >50          | 254001P00Ra.1  | AE    | >50          |
| CNE5            | AE    | 0.026        | PVO.04    | B     | >50          | CAP45.G3        | C     | >50          | 254004P00Rc.2  | AE    | 0.265        |
| CNE55           | AE    | 0.012        | QH0515.01 | B     | >50          | Ce1176.A3       | C     | >50          | 254006P00Ra.1  | AE    | >50          |
| CNE56           | AE    | 15.000       | QH0692.42 | B     | >50          | Ce703010217.B6  | C     | >50          | 40061v03.04b   | AE    | >50          |
| CNE59           | AE    | 45.000       | REJO.67   | B     | >50          | CNE30           | C     | >50          | 40100v01.09    | AE    | >50          |
| CNE8            | AE    | 5.880        | RHPA.7    | B     | >50          | CNE31           | C     | >50          | 40363v03.02    | AE    | 1.680        |
| M02138          | AE    | 0.091        | SC422.8   | B     | >50          | CNE53           | C     | >50          | 644039.c01b    | AE    | >50          |
| R1166.c1        | AE    | >50          | SF162     | B     | >50          | CNE58           | C     | 0.037        | NP03-C03       | AE    | >50          |

IC50 color code: 0.001-0.01 (red), 0.01-0.100 (orange), 0.100-1.00 (yellow), 1.00-10.0 (light green), 10.0-50.0 (green), >50.0 (µg/ml) (dark green)

\* Neutralization IC<sub>50</sub> to 12 clade AE strains (shown in italics) in addition to the standard 208-virus panel are also listed.

**Table S3. Statistics on VRC-PG05 neutralization profile based on the extended 220-isolate panel. Related to Figure 1.**

| <b>Neutralization panel</b>                                                             | <b>Number of isolates in panel</b> | <b>Number of sensitive isolates</b> | <b>Neutralization breadth (%)</b> |
|-----------------------------------------------------------------------------------------|------------------------------------|-------------------------------------|-----------------------------------|
| Neutralization breadth on 208 isolate panel                                             | 208                                | 56                                  | 26.9                              |
| Neutralization breadth on global virus panel                                            | 12                                 | 3                                   | 25.0                              |
| Neutralization breadth against tier 2 isolates                                          | 154                                | 40                                  | 26.0                              |
| Neutralization breadth on 35 clade AE isolates                                          | 35                                 | 20                                  | 57.1                              |
| Neutralization breadth on glycan N262, glycan N295, and glycan N448 containing isolates | 96                                 | 26                                  | 27.1                              |
| Neutralization breadth on glycan N262, glycan N448, and E293 containing isolates        | 89                                 | 51                                  | 57.3                              |
| Neutralization breadth on 220 isolate panel                                             | 220                                | 60                                  | 27.3                              |

**Table S4. Crystallographic data collection and refinement statistics. Related to Figure 2.**

| Protein                                              | VRC-PG05-gp120         |
|------------------------------------------------------|------------------------|
| <b>PDB ID</b>                                        | 6BF4                   |
| <b>Data collection</b>                               |                        |
| Space group                                          | C2                     |
| Cell dimensions                                      |                        |
| <i>a</i> , <i>b</i> , <i>c</i> (Å)                   | 231.4, 89.3, 123.4     |
| $\alpha$ , $\beta$ , $\gamma$ (°)                    | 90.0, 119.2, 90.0      |
| Resolution (Å)                                       | 50.0-2.38 (2.42-2.38)  |
| <i>R</i> <sub>sym</sub> Or <i>R</i> <sub>merge</sub> | 7.7 (56.1)             |
| <i>R</i> <sub>pim</sub>                              | 5.8 (34.6)             |
| <i>I</i> / $\sigma$ <i>I</i>                         | 17.5 (2.0)             |
| <i>CC</i> <sub>1/2</sub>                             | 0.9 (0.7)              |
| Completeness (%)                                     | 88.8 (50.4)            |
| Redundancy                                           | 3.3 (2.1)              |
| <b>Refinement</b>                                    |                        |
| Resolution (Å)                                       | 39.85-2.38 (2.41-2.38) |
| No. reflections                                      | 77844 (2207)           |
| <i>R</i> <sub>work</sub> / <i>R</i> <sub>free</sub>  | 19.4/23.1              |
| No. atoms                                            |                        |
| Protein                                              | 12053                  |
| Ligand/glycans                                       | 911                    |
| Water                                                | 172                    |
| B-factors (Å <sup>2</sup> )                          |                        |
| Protein                                              | 90.7                   |
| Ligand/ion                                           | 87.8                   |
| Water                                                | 54.7                   |
| r.m.s deviations                                     |                        |
| Bond lengths (Å)                                     | 0.003                  |
| Bond angles (°)                                      | 0.67                   |
| Ramachandran statistics                              |                        |
| Favored (%)                                          | 93.4                   |
| Outliers (%)                                         | 0.9                    |

\*Values in parenthesis denote highest resolution shell.

**Table S5. Contributions of glycan and protein to the VRC-PG05 epitope. Related to Figure 3 and 6.**

| <b>Contribution of protein and glycan elements to the VRC-PG05 epitope</b> |                        |                                  |             |                |
|----------------------------------------------------------------------------|------------------------|----------------------------------|-------------|----------------|
| Components                                                                 | Area (Å <sup>2</sup> ) | Area breakdown (Å <sup>2</sup> ) |             | Percentage (%) |
|                                                                            |                        | Heavy chain                      | Light chain |                |
| Glycan295                                                                  | 286                    | 105                              | 181         | 14             |
| Glycan262                                                                  | 739                    | 739                              | 0           | 35             |
| Glycan448                                                                  | 811                    | 391                              | 420         | 39             |
| Subtotal by glycans                                                        | 1836                   | 1236                             | 601         | 88             |
| Peptide                                                                    | 251                    | 95                               | 156         | 12             |
| Total area                                                                 | 2087                   |                                  |             |                |

| <b>Paratope of VRC-PG05 and contribution of different complementarity determining regions</b> |                        |      |                        |      |
|-----------------------------------------------------------------------------------------------|------------------------|------|------------------------|------|
| Region                                                                                        | Heavy chain            |      | Light chain            |      |
|                                                                                               | Area (Å <sup>2</sup> ) | %    | Area (Å <sup>2</sup> ) | %    |
| Framework 1                                                                                   | 9.3                    | 0.6  | 64.3                   | 3.8  |
| CDR 1                                                                                         | 123.9                  | 7.4  | 271.6                  | 16.1 |
| Framework 2                                                                                   | 0                      | 0.0  | 23.3                   | 1.4  |
| CDR 2                                                                                         | 173.5                  | 10.3 | 87.8                   | 5.2  |
| Framework 3                                                                                   | 40                     | 2.4  | 0.0                    | 0.0  |
| CDR 3                                                                                         | 724.4                  | 43.0 | 164.8                  | 9.8  |
| Framework 4                                                                                   | 0                      | 0.0  | 0.0                    | 0.0  |
| Total paratope                                                                                | 1071.1                 | 63.6 | 611.8                  | 36.4 |

**Table S6. Contributions of VRC-PG05 heavy and light chain paratope residues to the binding of HIV-1 glycans and amino acids. Related to Figure 3 and 6.**

| Glycan epitope       |        | Paratope surface area (Å <sup>2</sup> ) |        |    |     |    |    |        |    |    |    |    |        |    |    |    |    |    |    |      |      | Subtotal |      |      |     |     |
|----------------------|--------|-----------------------------------------|--------|----|-----|----|----|--------|----|----|----|----|--------|----|----|----|----|----|----|------|------|----------|------|------|-----|-----|
| Glycan               | Moiety | Frw 1                                   | CDR H1 |    |     |    |    | CDR H2 |    |    |    |    | CDR H3 |    |    |    |    |    |    |      |      |          |      |      |     |     |
|                      |        | 2                                       | 28     | 30 | 31  | 32 | 33 | 52A    | 53 | 57 | 58 | 59 | 61     | 64 | 94 | 95 | 96 | 97 | 99 | 100A | 100B | 100C     | 100D | 100E | 101 |     |
|                      |        | V                                       | P      | N  | R   | D  | W  | M      | D  | K  | D  | Y  | D      | K  | R  | I  | R  | Q  | S  | Y    | L    | Q        | W    | Y    | E   |     |
|                      | NAG762 |                                         |        |    |     |    |    |        |    |    |    |    |        |    |    |    |    |    |    | 35   | 1    |          |      |      | 36  |     |
|                      | NAG763 |                                         |        |    |     |    |    |        |    |    |    |    |        |    |    |    |    |    | 7  |      | 14   | 5        | 52   |      | 78  |     |
|                      | MAN764 |                                         |        |    |     |    |    |        |    |    |    |    |        |    |    |    |    |    |    |      |      |          | 28   |      | 28  |     |
|                      | MAN765 |                                         |        |    |     | 37 |    |        |    |    |    |    |        |    |    |    |    | 29 |    |      |      |          | 33   |      | 99  |     |
| N262                 | MAN766 |                                         | 6      |    | 23  | 16 |    |        |    |    |    |    |        |    | 10 | 3  | 15 | 22 |    |      |      |          |      |      | 5   | 101 |
|                      | MAN767 |                                         |        |    | 4   |    | 2  | 17     |    |    |    |    |        |    |    |    |    | 16 |    |      |      |          | 42   |      | 82  |     |
|                      | MAN770 |                                         | 1      |    |     |    |    |        |    |    |    |    |        |    | 23 |    | 22 | 0  |    |      |      |          |      |      | 19  | 66  |
|                      | MAN771 |                                         |        | 2  | 39  |    |    | 21     | 15 |    |    |    |        |    |    |    |    | 3  |    |      |      |          |      |      |     | 80  |
|                      | NAG795 |                                         |        |    |     |    |    |        |    |    |    |    |        |    |    |    |    |    | 19 |      |      |          |      |      | 19  |     |
| N295                 | MAN798 |                                         |        |    |     |    |    |        |    |    |    |    |        |    |    |    | 38 |    |    |      |      |          |      |      | 1   | 39  |
|                      | MAN799 | 3                                       |        |    |     |    |    |        |    |    |    |    |        |    | 7  |    | 5  |    |    |      |      |          |      |      | 17  | 31  |
|                      | NAG948 |                                         |        |    |     |    |    |        |    |    |    |    |        |    |    |    |    |    |    | 25   | 29   | 21       |      |      | 76  |     |
|                      | NAG949 |                                         |        |    |     |    |    |        |    |    |    |    |        |    |    |    |    |    |    | 45   |      | 19       |      | 7    | 70  |     |
|                      | MAN950 |                                         |        |    |     |    |    |        |    |    |    |    |        |    |    |    |    |    |    | 30   |      |          |      | 5    | 35  |     |
| N448                 | MAN951 |                                         |        |    |     |    |    |        |    |    |    |    |        |    |    |    |    |    |    | 6    |      |          |      |      | 6   |     |
|                      | MAN954 |                                         |        |    |     |    |    |        |    |    |    |    |        |    |    |    |    |    |    |      |      |          |      | 3    | 3   |     |
|                      | MAN955 |                                         |        |    |     |    |    |        | 5  | 39 |    |    |        |    |    |    |    |    |    | 2    |      |          |      | 14   | 60  |     |
|                      | MAN956 |                                         |        |    |     |    |    |        |    | 22 | 7  | 4  | 36     |    |    |    |    |    |    |      |      |          |      |      | 70  |     |
| Subtotal for glycan  |        | 3                                       | 7      | 2  | 103 | 16 | 2  | 38     | 15 | 5  | 61 | 7  | 4      | 36 | 40 | 3  | 81 | 72 | 26 | 108  | 79   | 45       | 155  | 29   | 42  | 978 |
| gp120 peptide        |        |                                         |        |    |     |    |    |        |    |    |    |    |        |    |    |    |    |    |    | 20   | 1    | 92       |      |      | 113 |     |
| Total for glycan     |        | 978                                     |        |    |     |    |    |        |    |    |    |    |        |    |    |    |    |    |    |      |      |          |      |      |     |     |
| Total for peptide    |        | 113                                     |        |    |     |    |    |        |    |    |    |    |        |    |    |    |    |    |    |      |      |          |      |      |     |     |
| Total on heavy chain |        | 1091                                    |        |    |     |    |    |        |    |    |    |    |        |    |    |    |    |    |    |      |      |          |      |      |     |     |

  

| Glycan epitope       |        | Paratope surface area (Å <sup>2</sup> ) |        |    |     |     |        |    |    |    |        |    |    |    |    |    |     | Subtotal |  |  |  |   |    |    |     |    |
|----------------------|--------|-----------------------------------------|--------|----|-----|-----|--------|----|----|----|--------|----|----|----|----|----|-----|----------|--|--|--|---|----|----|-----|----|
| Glycan               | Moiety | Frw 1                                   | CDR L1 |    |     |     | CDR L2 |    |    |    | CDR L3 |    |    |    |    |    |     |          |  |  |  |   |    |    |     |    |
|                      |        | 1                                       | 2      | 27 | 27D | 27E | 27F    | 28 | 29 | 30 | 49     | 50 | 54 | 55 | 56 | 92 | 93  | 94       |  |  |  |   |    |    |     |    |
|                      |        | D                                       | I      | Q  | Y   | R   | P      | N  | N  | R  | H      | W  | R  | E  | S  | F  | F   | L        |  |  |  |   |    |    |     |    |
|                      | NAG795 |                                         |        |    |     |     |        | 4  |    | 13 |        |    | 15 |    |    |    |     |          |  |  |  |   |    |    | 32  |    |
|                      | MAN797 |                                         |        |    |     |     |        |    |    |    |        |    |    |    |    |    |     |          |  |  |  |   | 11 |    | 11  |    |
| N295                 | MAN798 |                                         |        |    |     |     |        |    |    |    |        |    | 21 |    | 2  | 26 | 28  |          |  |  |  |   |    |    | 77  |    |
|                      | MAN799 |                                         |        |    |     |     |        |    |    |    |        |    |    |    |    | 14 | 21  |          |  |  |  |   |    |    | 35  |    |
|                      | NAG948 |                                         |        |    |     | 24  |        |    | 13 |    |        |    |    |    |    |    |     |          |  |  |  |   |    |    | 37  |    |
|                      | NAG949 |                                         |        |    |     | 19  |        |    | 5  |    |        |    |    |    |    |    |     |          |  |  |  |   |    |    | 25  |    |
|                      | MAN950 |                                         |        |    |     |     |        |    |    |    |        |    |    |    |    |    |     |          |  |  |  | 3 | 20 |    | 23  |    |
| N448                 | MAN951 | 3                                       |        |    | 15  |     |        |    |    |    |        |    |    |    |    |    |     |          |  |  |  |   |    | 25 | 43  |    |
|                      | MAN952 | 40                                      | 1      | 25 |     |     |        |    |    |    |        |    |    |    |    |    |     |          |  |  |  |   |    | 19 | 85  |    |
|                      | MAN954 |                                         |        |    |     |     |        |    |    |    |        |    |    |    |    |    |     |          |  |  |  |   |    | 4  | 4   |    |
|                      | MAN955 |                                         |        |    |     |     |        |    |    |    |        |    |    |    |    |    |     |          |  |  |  |   |    | 22 | 29  | 51 |
|                      | MAN956 | 1                                       |        |    |     |     |        |    |    |    |        |    |    |    |    |    |     |          |  |  |  |   |    | 18 | 31  | 50 |
| Subtotal for glycan  |        | 44                                      | 1      | 40 | 43  |     | 19     | 4  |    | 13 | 21     | 15 | 2  | 40 | 60 | 3  | 109 | 60       |  |  |  |   |    |    | 474 |    |
| gp120 peptide        |        |                                         |        |    |     | 10  | 28     | 69 | 17 | 17 |        |    |    |    |    |    |     |          |  |  |  |   |    |    | 142 |    |
| Total for glycan     |        | 474                                     |        |    |     |     |        |    |    |    |        |    |    |    |    |    |     |          |  |  |  |   |    |    |     |    |
| Total for peptide    |        | 142                                     |        |    |     |     |        |    |    |    |        |    |    |    |    |    |     |          |  |  |  |   |    |    |     |    |
| Total on light chain |        | 615                                     |        |    |     |     |        |    |    |    |        |    |    |    |    |    |     |          |  |  |  |   |    |    |     |    |

**Table S7. Hydrogen bonds between HIV-1 gp120 glycans and VRC-PG05. Related to Figure 3 and 6.**

Heavy chain

| ## | VRC-PG05       | Distance [Å] | gp120 glycans |
|----|----------------|--------------|---------------|
| 1  | H:TRP100D[NE1] | 2.74         | G:NAG763[O3]  |
| 2  | H:GLN97[NE2]   | 3.23         | G:MAN765[O3]  |
| 3  | H:ARG31[NH1]   | 3.02         | G:MAN765[O4]  |
| 4  | H:GLN97[N]     | 2.93         | G:MAN766[O3]  |
| 5  | H:GLN97[NE2]   | 2.91         | G:MAN766[O4]  |
| 6  | H:ARG94[NH2]   | 3.84         | G:MAN766[O6]  |
| 7  | H:ASP32[OD1]   | 2.68         | G:MAN766[O6]  |
| 8  | H:ARG94[NH2]   | 3.8          | G:MAN770[O4]  |
| 9  | H:ARG31[NE]    | 2.56         | G:MAN771[O6]  |
| 10 | H:ARG96[NH2]   | 3.44         | G:MAN798[O4]  |
| 11 | H:GLN100C[NE2] | 3.88         | G:NAG948[O3]  |
| 12 | H:TYR100A[O]   | 3.03         | G:NAG948[N2]  |
| 13 | H:GLN100C[NE2] | 2.73         | G:NAG949[O6]  |
| 14 | H:LYS64[NZ]    | 2.87         | G:MAN956[O2]  |
| 15 | H:LYS64[NZ]    | 2.79         | G:MAN956[O3]  |

Light chain

| ## | VRC-PG05     | Distance [Å] | gp120 glycans |
|----|--------------|--------------|---------------|
| 1  | L:SER56[N]   | 2.79         | G:MAN798[O3]  |
| 2  | L:TYR27D[OH] | 3.71         | G:NAG948[O4]  |
| 3  | L:ASP1[N]    | 2.54         | G:MAN952[O6]  |



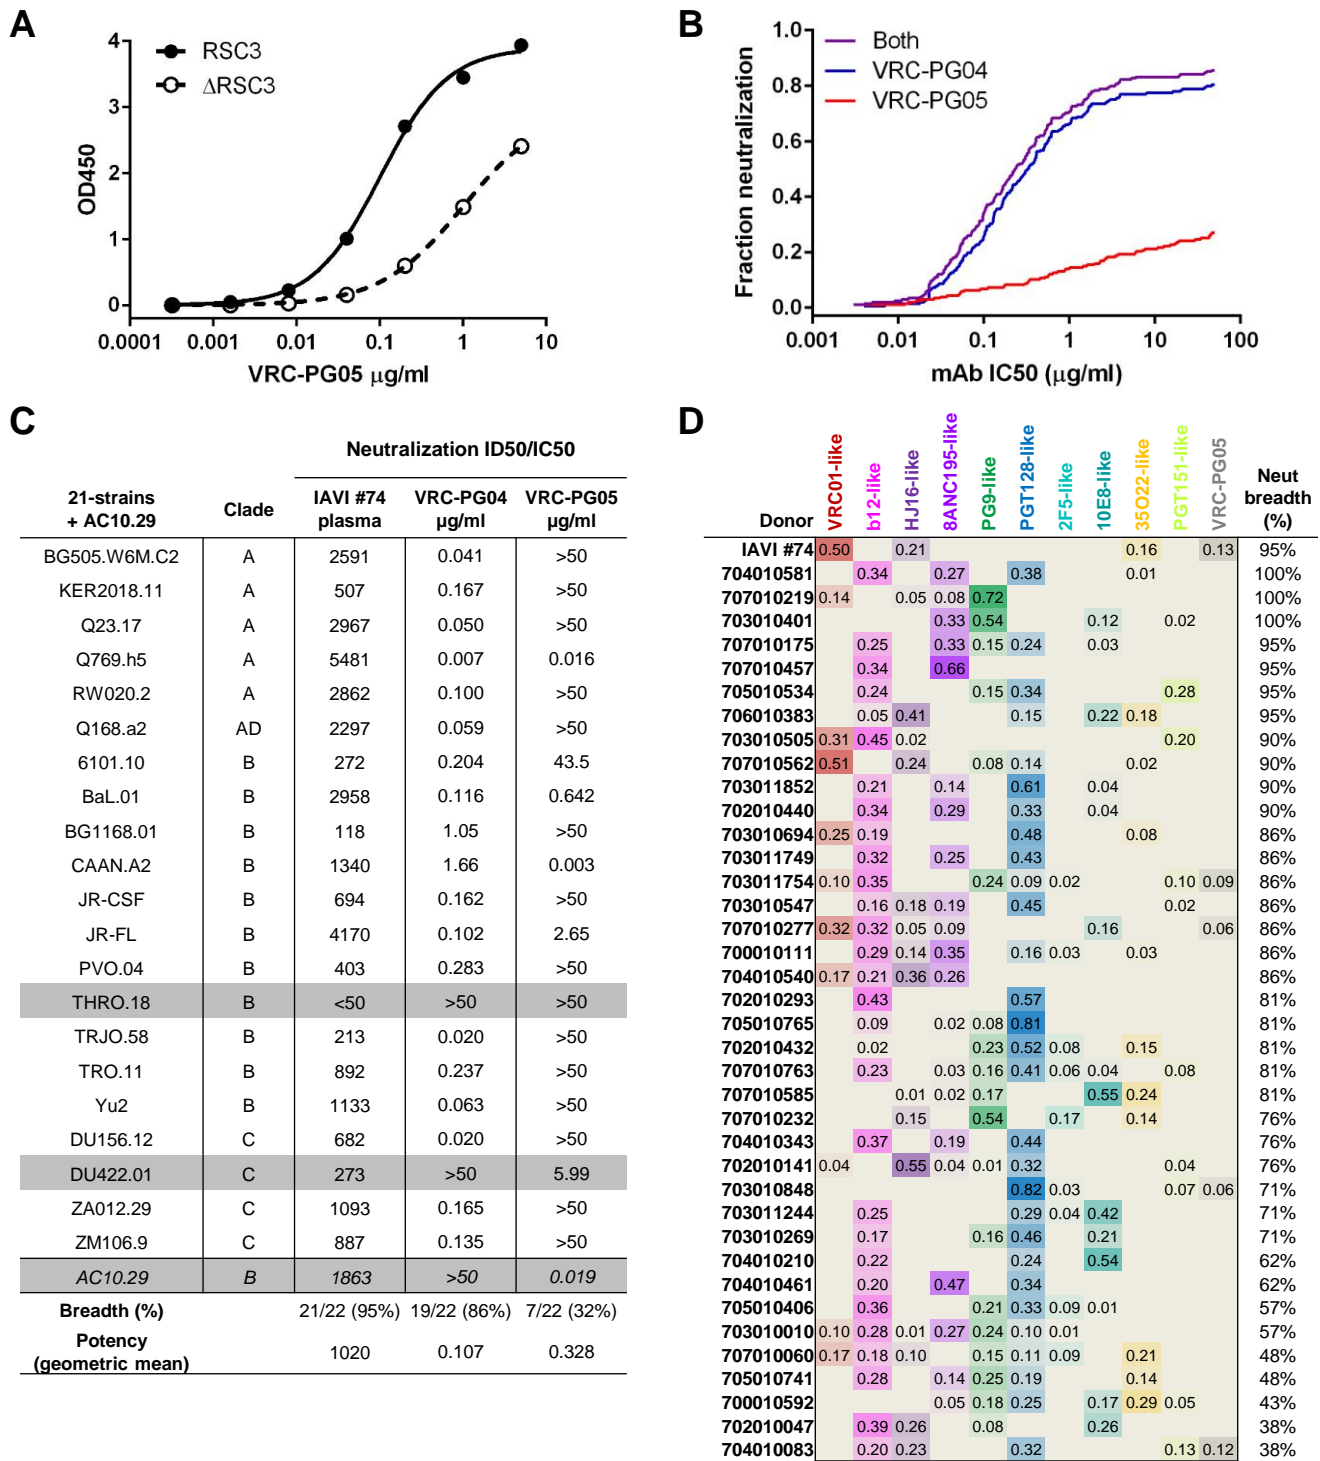

**Figure S1. Binding and neutralization of VRC-PG05 and its relevance in donor plasma.** Related to Figure 1.

- (A) Differential binding of VRC-PG05 to RSC3 and  $\Delta$ RSC3, the epitope-specific molecular probes used to isolate single B cells.
- (B) Neutralization profile of VRC-PG04, VRC-PG05 and their combination on 208 HIV-1 isolates. Breadth (y-axis) and potency (x-axis) are plotted for VRC-PG04, VRC-PG05, and their combination as calculated based on neutralization by individual antibodies.
- (C) Neutralization ID50 of donor IAVI #74 plasma (shown as reciprocal dilution) and IC50 for antibody VRC-PG04 and antibody VRC-PG05 (shown as concentration) on AC10.29 as well as on a 21-strain panel (Georgiev et al., Science 2013) used for neutralization fingerprint calculation in (D). Three VRC-PG04-resistant strains are highlighted.
- (D) Neutralization fingerprint analysis of donor plasma (rows) deconvoluted into component antibody specificities (columns), including the VRC-PG05 component specificity. For each donor, the predicted contribution to neutralization from each of 11 antibody specificities (colored labels) is shown, with values ranging from 0 (no contribution) to 1 (donor neutralization can be attributed to a single antibody specificity) and with color intensity proportional to magnitude of values. Donor IAVI #74 (top row) and 38 other HIV-1-infected donors from a CHAVI cohort (subsequent rows), which was previously analyzed (Pancera et al., Nature 2014), but without the VRC-PG05 specificity that we define here.

A

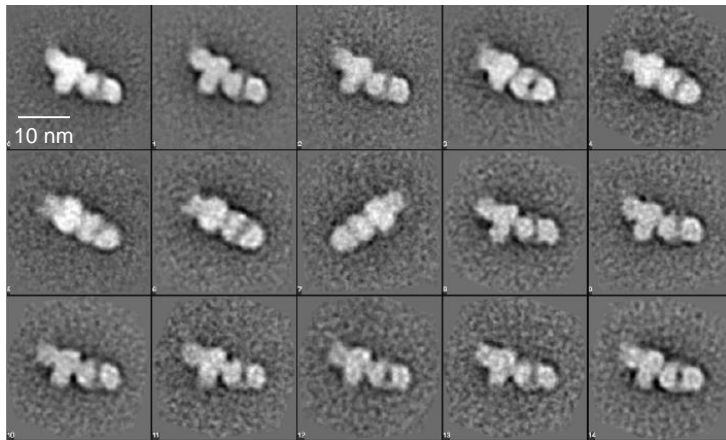

B

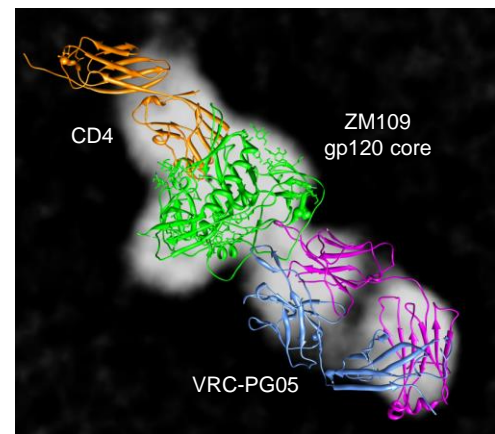

**Figure S2. Negative-stain electron microscopy of VRC-PG05 bound to HIV-1 ZM109 gp120 core.** related to Figure 2.

(A) Reference-free 2D classification of ternary complex of VRC-PG05, gp120 and two-domain CD4.

(B) Model of VRC-PG05, two-domain CD4 and gp120 were superposed onto the negative stain electron density.

**Figure S3**

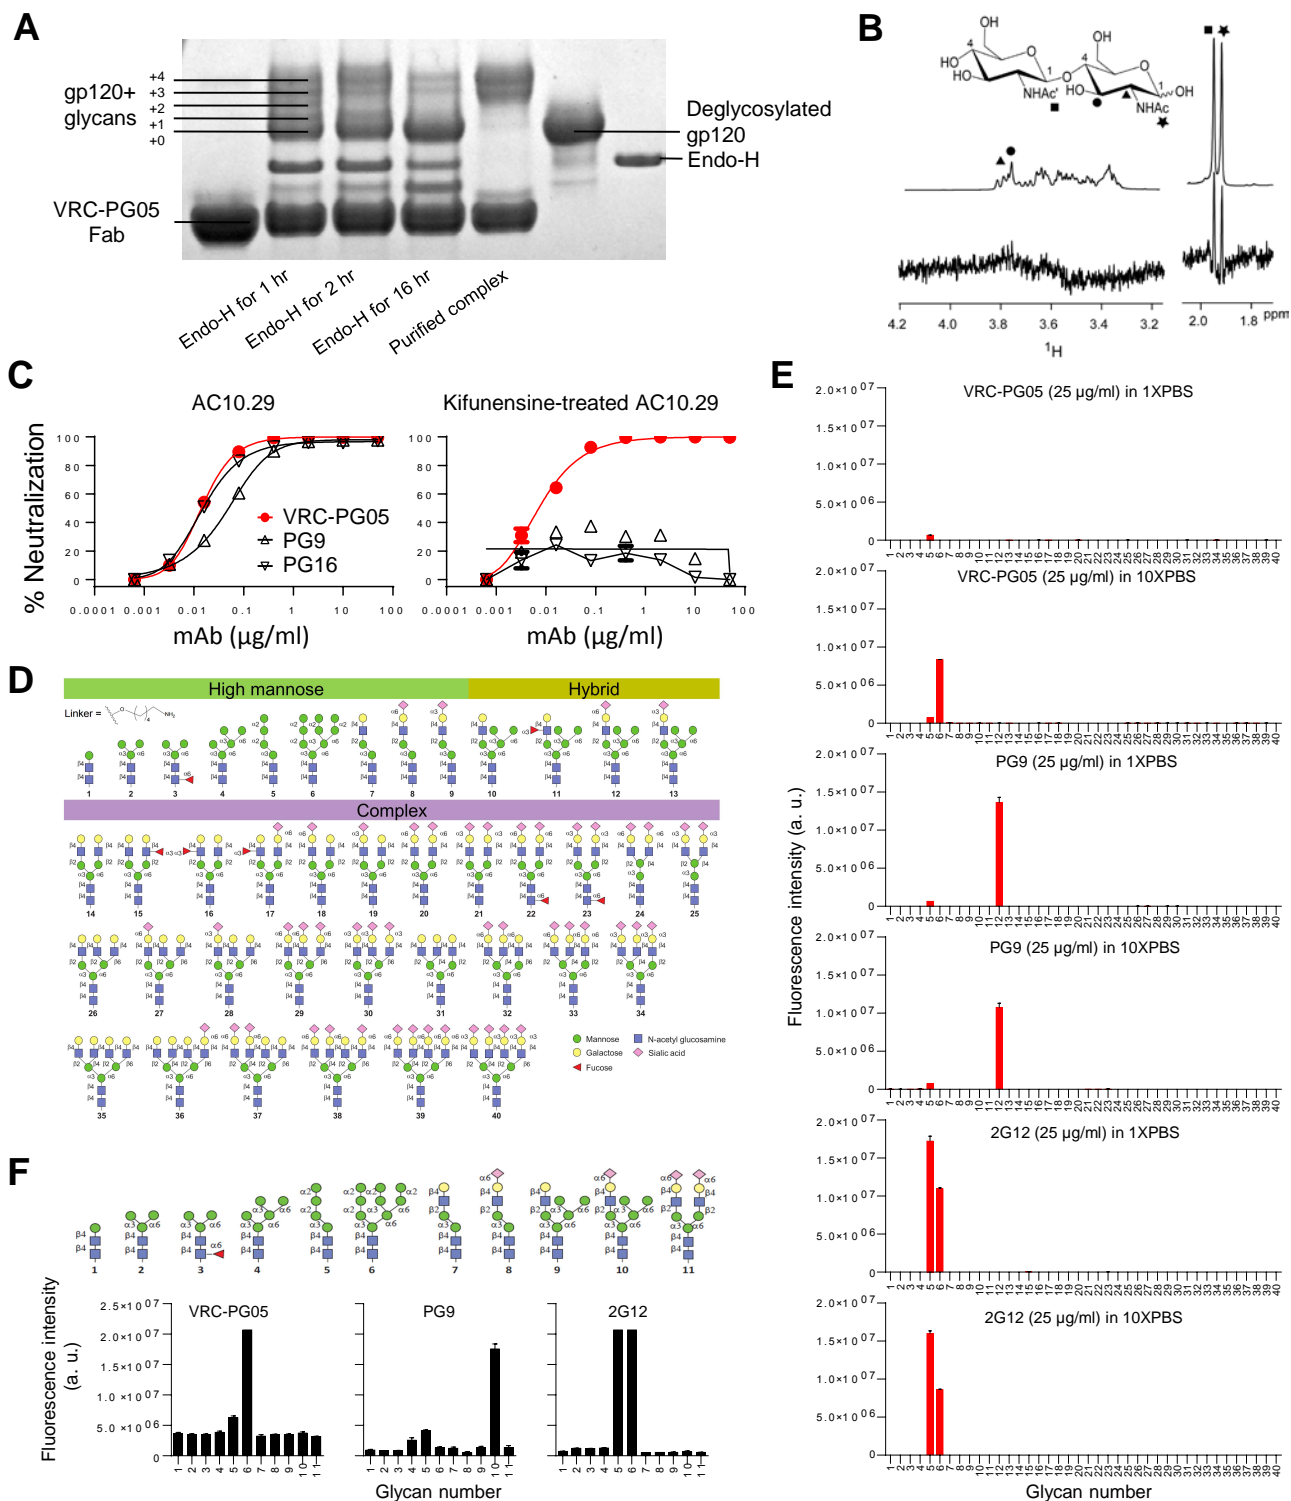

**Figure S3. VRC-PG05 interaction with glycans.** Related to Figure 3.

- (A) Binding of VRC-PG05 shields several N-linked glycans on HIV-1 CNE55 gp120 from Endo-H digestion. SDS-PAGE analysis of samples at different time points of Endo-H digestion and the purified VRC-PG05-gp120 complex showed 3 to 4 glycans were protected by VRC-PG05.
- (B) Nuclear magnetic resonance (NMR) analysis showed that VRC-PG05 binds to the two base N-acetylglucosamine groups at the N-linked glycosylation site.
- (C) Neutralization of AC10.29 Env-pseudovirus generated in the presence of kifunensine indicates VRC-PG05 recognizes high mannose on gp120. Antibodies PG9 and PG16 were included as controls.
- (D) Schematic representation of the 40 N-glycans printed on NHS-coated microarray glass slides.
- (E) Binding profiles for antibodies VRC-PG05, PG9 and 2G12 to NHS-glycan array in 1x and 10x PBS; glycan numbers shown in (D).
- (F) Schematic of the 11 N-glycans printed on ACG-coated microarray with binding profiles for antibodies VRC-PG05, PG9 and 2G12 in 1xPBS.

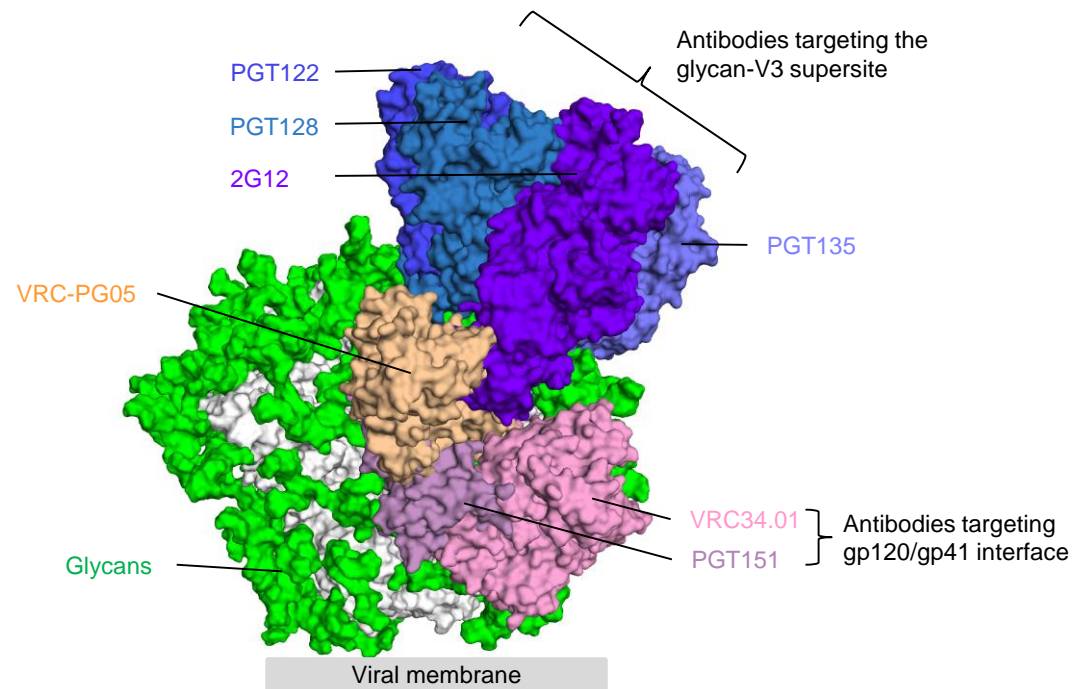

**Figure S4. Comparison of modes of recognition of VRC-PG05 and other glycan-reactive antibodies.** Related to Figure 4.

Binding modes and locations of VRC-PG05 and antibodies targeting the glycan-V3 supersite and the gp120/gp41 interface. VRC-PG05 is colored in orange, glycan-V3 antibodies are shown in surface representation in shades of blue, and gp120/gp41 interface antibodies are colored in lavender/pink. HIV-1 Env is shown in gray surface with glycans shown in green.

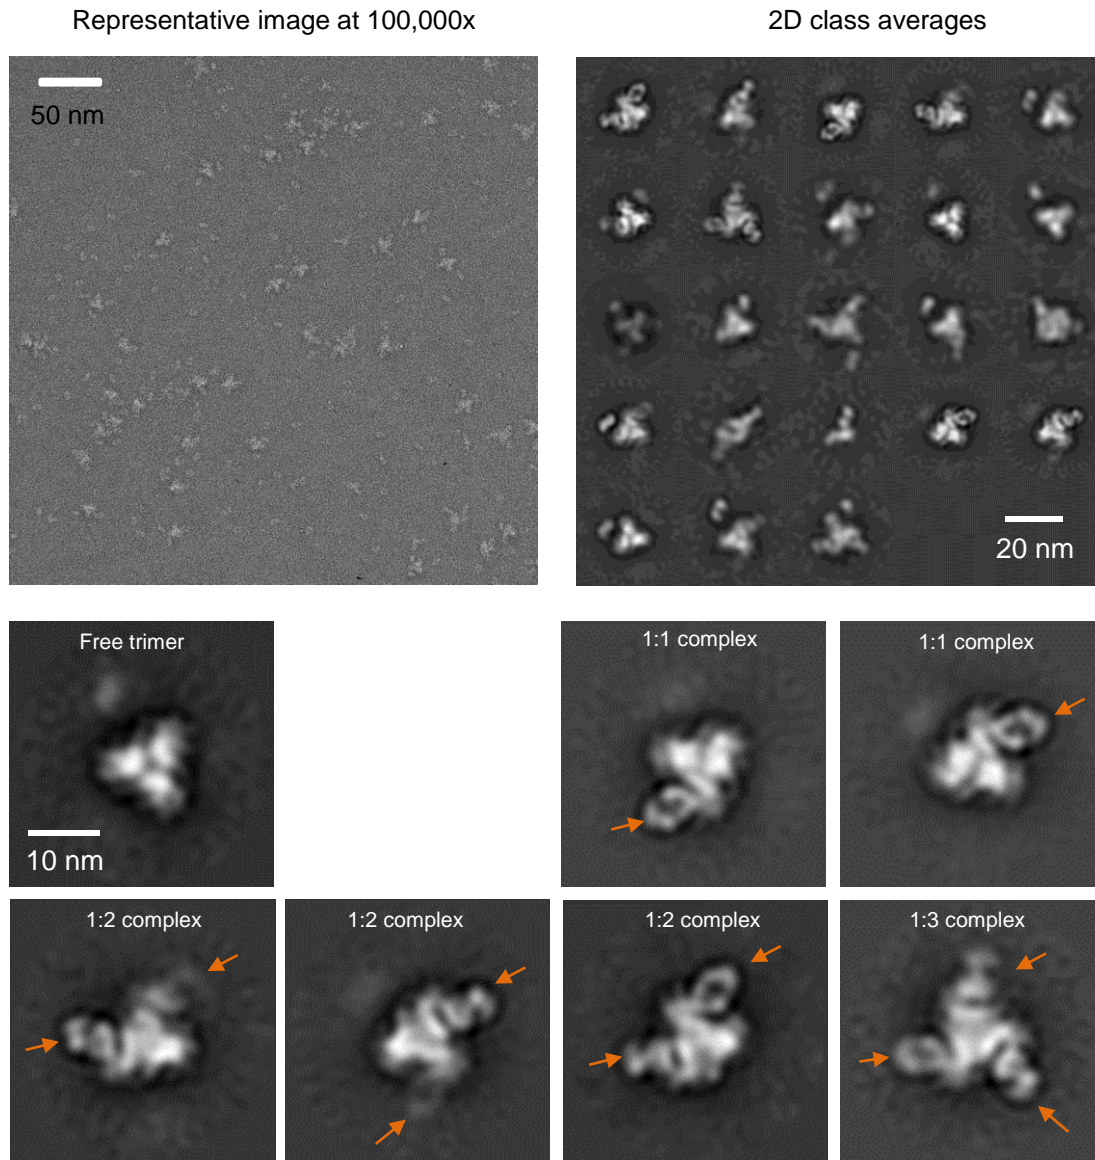

**Figure S5. Negative-stain electron microscopy of AC10.29.SOSIP Env in complex with VRC-PG05.** Related to Figure 5. Locations of VRC-PG05 Fab bound to Env trimer are marked by orange arrows. 1, 2 and 3 VRC-PG05 Fabs were observed to bind to each AV10.29 Env trimer.



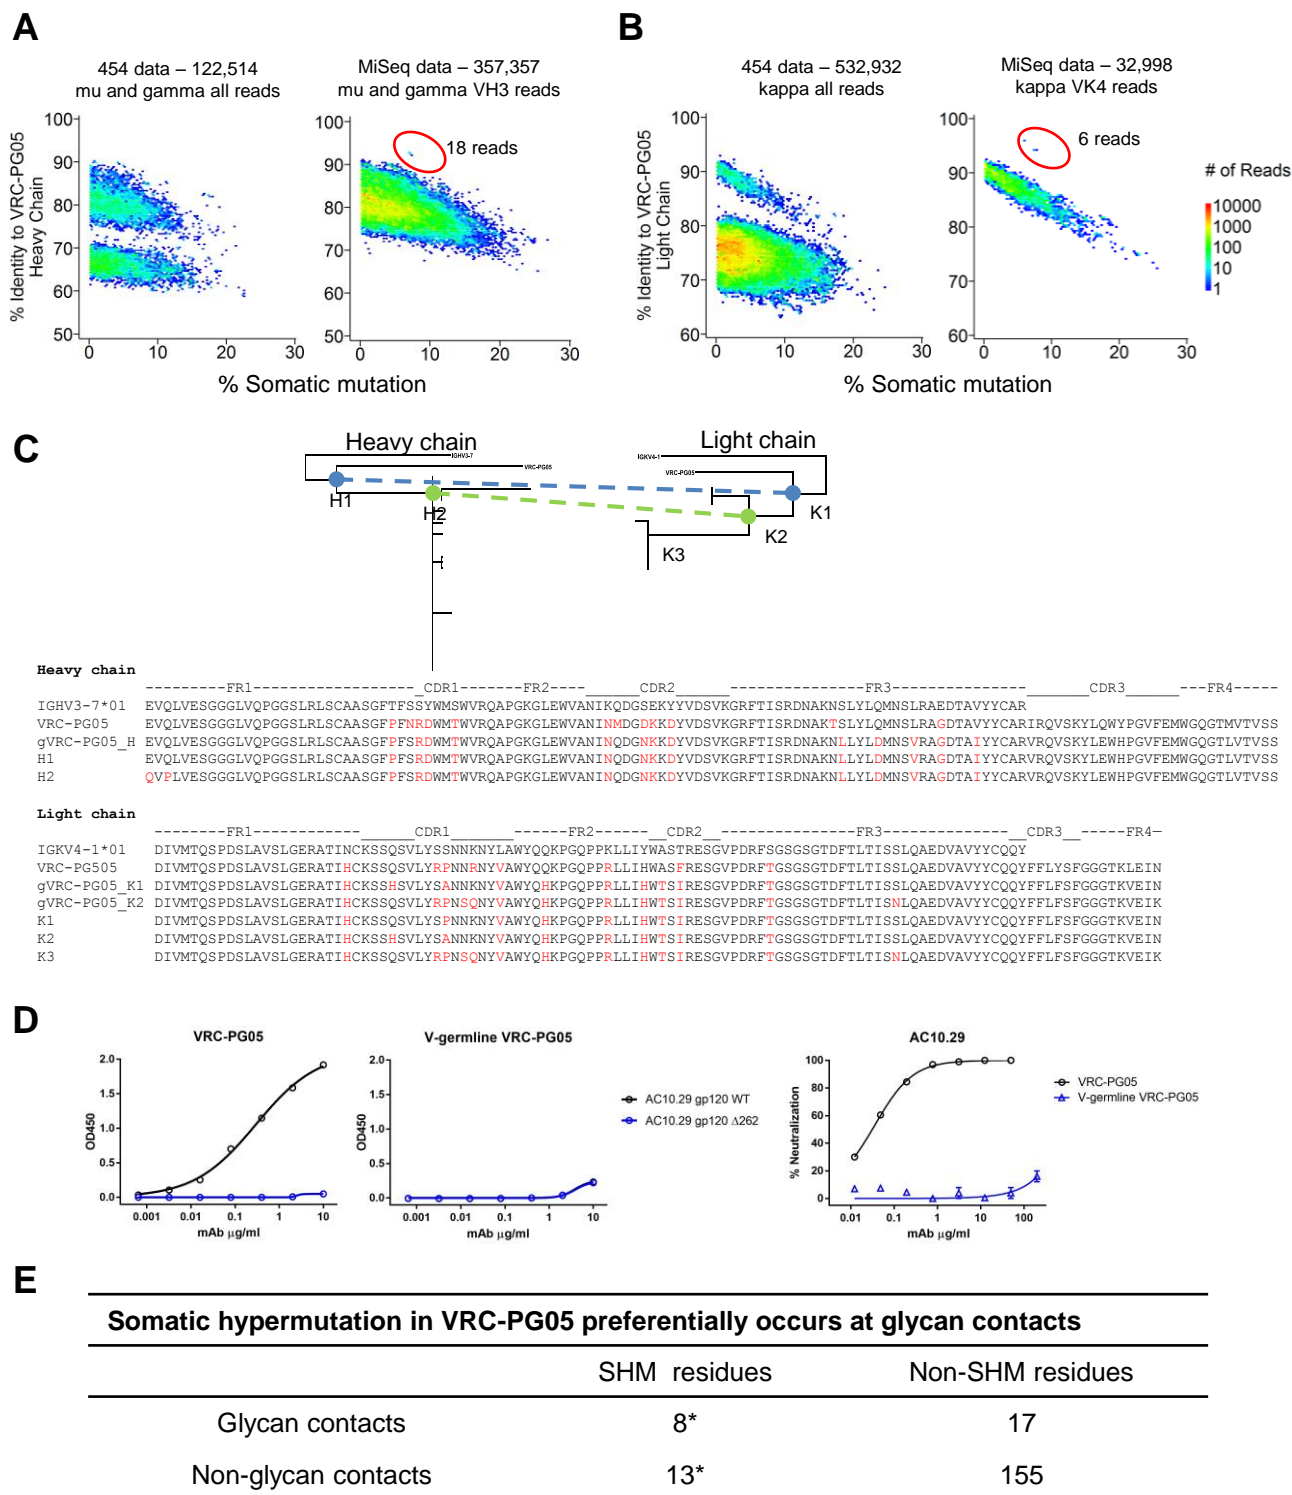

**Figure S6. VRC-PG05 clonal variants identified by next generation sequencing.** Related to Figure 6. (A, B) Subsets of expressed heavy-chain (A) and kappa-chain (B) sequences obtained by NGS (454 data to left of MiSeq data) from IAVI donor #74 (2008 sample) are plotted as sequence identity to VRC-PG05 and sequence divergence from the putative germline V-genes. VRC-PG05 heavy and light chain variants derived from NGS are provided in (C) below each panel. (C) Phylogenetic tree and inferred intermediate sequences of VRC-PG05 derived from NGS. Somatic hypermutations are colored red. (D) Comparison of wild-type and V-gene-reverted VRC-PG05 by gp120 ELISA (left two panels) and neutralization (right panel) of strain AC10.29. (E) Analysis of occurrence of somatic hypermutations in paratope of VRC-PG05. \*P = 0.0017

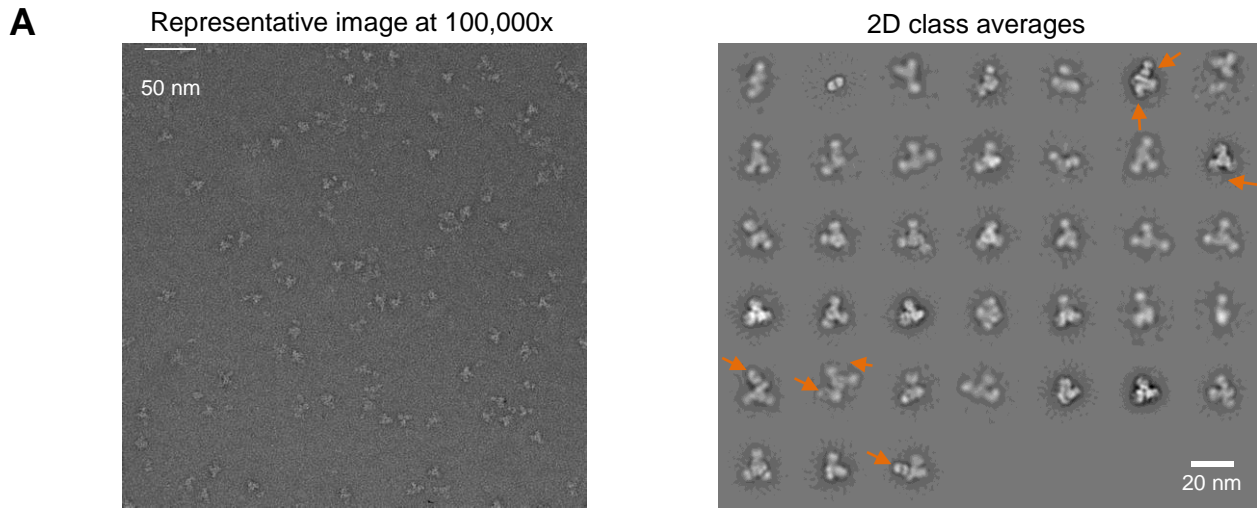

**B**

| Donor #74 Env clones | VRC01 | VRC-PG04 | VRC-PG05 | 10E8  |
|----------------------|-------|----------|----------|-------|
| 74_08dA06            | >50   | >50      | >50      | 0.155 |
| 74_08dA13            | >50   | >50      | 21.7     | 0.897 |
| 74_08dA16            | >50   | >50      | >50      | 0.496 |
| 74_08dA18            | >50   | >50      | >50      | 0.441 |
| 74_08dB07            | >50   | >50      | >50      | 1.160 |
| 74_08dB08            | >50   | >50      | >50      | 1.930 |
| 74_08dB14            | >50   | >50      | >50      | 1.150 |
| 74_08dB31            | >50   | >50      | 15.5     | 3.580 |

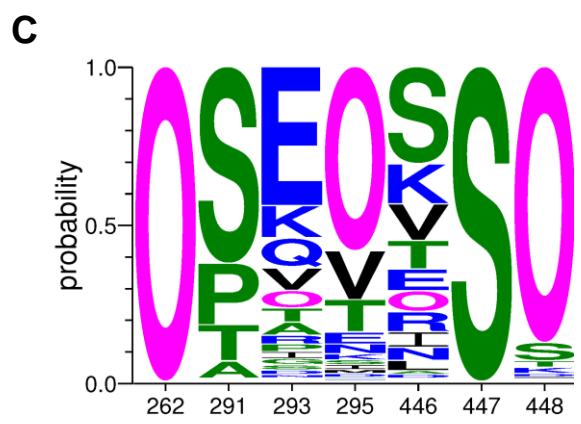

**D**

| Position | Percentage and raw count of non-gap residues                                                                                                                                                             | Non-gap/total (percentage) | Gap/total (percentage) |
|----------|----------------------------------------------------------------------------------------------------------------------------------------------------------------------------------------------------------|----------------------------|------------------------|
| 262      | O*: 99.52% (5139) other: 0.48% (25)                                                                                                                                                                      | 5164/5164 (100.00%)        | 0/5164 (0.00%)         |
| 291      | S: 62.15% (3208) P: 19.51% (1007) T: 11.45% (591) A: 5.48% (283) other: 1.41% (73)                                                                                                                       | 5162/5164 (99.96%)         | 2/5164 (0.04%)         |
| 293      | E: 43.94% (2268) K: 10.17% (525) Q: 9.55% (493) V: 7.13% (368) O: 5.60% (289) T: 4.48% (231) A: 4.13% (213) R: 2.83% (146) P: 2.42% (125) I: 2.09% (108) G: 2.00% (103) S: 1.70% (88) other: 3.97% (205) | 5162/5164 (99.96%)         | 2/5164 (0.04%)         |
| 295      | O: 58.14% (3001) V: 15.56% (803) T: 10.25% (529) E: 3.84% (198) N: 3.08% (159) K: 1.96% (101) S: 1.61% (83) I: 1.36% (70) other: 4.22% (218)                                                             | 5162/5164 (99.96%)         | 2/5164 (0.04%)         |
| 446      | S: 30.75% (1587) K: 12.69% (655) V: 11.55% (596) T: 9.07% (468) E: 6.84% (353) O: 6.65% (343) R: 6.39% (330) I: 4.84% (250) N: 4.20% (217) L: 3.20% (165) other: 3.82% (197)                             | 5161/5164 (99.94%)         | 3/5164 (0.06%)         |
| 447      | S: 99.54% (5139) other: 0.46% (24)                                                                                                                                                                       | 5163/5164 (99.98%)         | 1/5164 (0.02%)         |
| 448      | O: 87.24% (4504) S: 5.87% (303) T: 2.03% (105) other: 4.86% (251)                                                                                                                                        | 5163/5164 (99.98%)         | 1/5164 (0.02%)         |

\* O: potential N-linked glycosylation site; other letters represents single-letter code for amino acids.

**Figure S7. VRC-PG05 binding to BG505.SOSIP mutant, neutralization sensitivity of select autologous Env clones from IAVI donor #74 and sequence frequency analysis of epitope residues.** Related to Figure 7.

(A) Negative-stain electron microscopy of BG505.SOSIP.Q393E in complex with VRC-PG05. Locations of bound-antibody were marked by orange arrows.

(B) Neutralization sensitivity of select autologous Env clones from a PBMC genomic DNA sample (02/05/2008) of IAVI donor #74.

(C) WebLogo plot of HIV-1 gp120 residues at positions 262, 291, 293, 446, 447 and 448 in 5164 sequences from the Los Alamos National Laboratory HIV database. Potential N-linked glycosylation site is represented by letter O, all amino acids are represented by single letter codes.

(D) Detailed list of amino acid frequency at each position.
